# Supplementary material
Source: publisher site journal article supplement (http://www.kjim.org/upload/media/kjim-2019-204-suppl1.pdf)
Supplement: Supplementary file 1 [file kjim-2019-204-suppl1.pdf]

Supplementary Table 1. Single variant association with eQTL analysis in GTEx

| Trait                 | SNP ID (KoGES)  | Proxy        | Chr:Pos              | Variant ID           | GeneCode ID        | Gene symbol     | p value  | NES (effect size) | Tissue           |
|-----------------------|-----------------|--------------|----------------------|----------------------|--------------------|-----------------|----------|-------------------|------------------|
| FEV <sub>1</sub>      | rs7742369       | rs7742369    | 6:34,165,721         | 6_34165721_A_G_b37   | ENSG00000186577.7  | SMIM29 (C6orf1) | 0.000032 | 0.13              | Skin             |
|                       | rs7742369       | rs7742369    | 6:34,165,721         | 6_34165721_A_C_b37   | ENSG00000186577.7  | SMIM29 (C6orf1) | 0.000073 | 0.14              | Thyroid          |
|                       | rs2780226       | rs2780226    | 6:34,199,092         | 6_34199092_C_T_b37   | ENSG00000186577.7  | SMIM29 (C6orf1) | 0.000024 | -0.17             | Skin             |
|                       | rs2780226       | rs2780226    | 6:34,199,092         | 6_34199092_C_T_b37   | ENSG00000186577.7  | SMIM29 (C6orf1) | 0.000042 | -0.21             | Esophagus-mucosa |
|                       | rs1150781       | rs1150781    | 6:34,214,322         | 6_34214322_C_G_b37   | ENSG00000186577.7  | SMIM29 (C6orf1) | 0.000012 | -0.18             | Skin             |
|                       | rs1130,247,700  | none         | 11:130,247,700       | -                    | -                  | -               | -        | -                 | -                |
|                       | rs1130,247,700  | rs4937505    | 11:130,247,781       | 11_130247781_T_A_b37 | -                  | -               | -        | -                 | -                |
|                       | rs12110,390,979 | None         | 12:110,390,979       | -                    | -                  | -               | -        | -                 | -                |
|                       | rs12110,390,979 | rs11069018   | 12:110386611         | 12_110386611_G_A_b37 | ENSG00000139437.16 | GIT2            | 4.60E-07 | -0.28             | Artery - tibial  |
|                       | rs12110,390,979 | rs11069018   | 12:110389404         | 12_110389404_T_C_b37 | ENSG00000139437.16 | GIT2            | 0.000034 | -0.32             | Testis           |
| rs12110,390,979       | rs2292354       | 12:110368201 | 12_110368201_G_A_b37 | ENSG00000139437.13   | TCHP               | 0.000022        | -0.31    | Colon - sigmoid   |                  |
| rs12110,390,979       | rs1106939       | 12:110413252 | 12_110413252_G_C_b37 | ENSG00000139437.13   | TCHP               | 0.000055        | -0.33    | Colon - sigmoid   |                  |
| rs114591848           | rs114591848     | 14:21550,212 | -                    | -                    | -                  | -               | -        | -                 |                  |
| rs114591848           | rs398117960     | 14:21545490  | 14_21545490_C_CT_b37 | ENSG00000165801.5    | ARHGEF40           | 7.40E-09        | -0.20    | Lung              |                  |
| rs114591848           | rs3827911       | 14:21548159  | 14_21548159_G_A_b37  | ENSG00000165801.5    | ARHGEF40           | 1.10E-07        | -0.18    | Lung              |                  |
| rs114591848           | rs3827913       | 14:21548448  | 14_21548448_G_A_b37  | ENSG00000165801.5    | ARHGEF40           | 3.20E-08        | -0.19    | Lung              |                  |
| rs114591848           | rs1958395       | 14:21551058  | 14_21551058_G_A_b37  | ENSG00000165801.5    | ARHGEF40           | 4.30E-08        | -0.19    | Lung              |                  |
| FEV <sub>1</sub> /FVC | rs7671167       | rs7671167    | 4:89,883,979         | 4_89883979_C_T_b37   | ENSG00000138640.10 | FAM13A          | 0.000012 | 0.16              | Lung             |
| rs2239688             | rs2239688       | 6:32,054,212 | 6_32054212_C_G_b37   | -                    | -                  | -               | -        | -                 |                  |
| rs2239688             | rs79770049      | 6:31,997,493 | 6_31977493_C_T_b37   | ENSG00000168477.13   | TNXB               | 3.50E-13        | 0.63     | Adrenal gland     |                  |
| rs2239688             | rs2746414       | 6:31,996,966 | 6_31996966_G_A_b37   | ENSG00000168477.13   | TNXB               | 2.70E-07        | 0.62     | Adrenal gland     |                  |
| rs2239688             | rs2852706       | 6:31,972,370 | 6_31972370_G_C_b37   | ENSG00000168477.13   | TNXB               | 0.000014        | 0.50     | Adrenal gland     |                  |
| rs2239688             | rs76096058      | 6:31,997,549 | 6_31977548_G_A_b37   | ENSG00000168477.13   | TNXB               | 0.000027        | 0.54     | Adrenal gland     |                  |
| rs2070600             | rs2070600       | 6:32,151,443 | 6_32151443_C_T_b37   | ENSG00000204305.9    | AGER               | 0.000061        | -0.28    | Lung              |                  |

Means that no significant eQTL were found for SNP in eQTL tissues.

eQTL, expression quantitative trait loci; GTEx, genotype-tissue expression; SNP, single nucleotide polymorphism; KoGES, Korean Genome and Epidemiology Study; Chr, chromosome; Pos, position; NES, normalized effect size; SMIM29, small integral membrane protein 29; GIT2, G protein-coupled receptor kinase interacting, Arf-GAP 2; TCHP, trichoplein keratin filament binding protein; ARHGEF40, rho guanine nucleotide exchange factor 40; FAM13A, family with sequence similarity 13 member A; TNXB, tenascin XB; AGER, advanced glycosylation end-product specific receptor.
